## Impaired Regulation of the Incretin Effect in Patients with Type 2 Diabetes

Jonatan I. Bagger, Filip K. Knop, Asger Lund, Henrik Vestergaard, Jens J. Holst, and Tina Vilsbøll

Diabetes Research Division (J.I.B., F.K.K., A.L., T.V.), Department of Internal Medicine F, Gentofte Hospital; Center for Endocrinology and Metabolism (J.I.B., H.V.), Department of Medicine O, Herlev Hospital; and Department of Biomedical Sciences (J.J.H.), The Panum Institute, University of Copenhagen, DK-2900 Copenhagen, Denmark

**Objective:** In healthy subjects, the incretin effect during an oral glucose tolerance test increases with the size of glucose load, resulting in similar glucose excursions independently of the glucose loads. Whether patients with type 2 diabetes mellitus (T2DM) are able to regulate their incretin effect is unknown.

**Research Design and Methods:** Incretin effect was measured over 6 d by means of three 4-h oral glucose tolerance test with increasing glucose loads (25, 75, and 125 g) and three corresponding isoglycemic iv glucose infusions in eight patients with T2DM [fasting plasma glucose, mean 7.7 (range 7.0–8.9) mM; glycosylated hemoglobin, 7.0% (6.2–8.4%)] and eight matched healthy control subjects [fasting plasma glucose, 5.3 (4.8–5.7) mM; glycosylated hemoglobin, 5.4% (5.0–5.7%)].

**Results:** Patients with T2DM exhibited higher peak plasma glucose in response to increasing oral glucose loads, whereas no differences in peak plasma glucose values among control subjects were observed. The incretin effect was significantly ( $P < 0.003$ ) lower in patients with T2DM ( $0 \pm 7$ ,  $11 \pm 9$ , and  $36 \pm 5\%$ ) as compared with control subjects ( $36 \pm 5$ ,  $53 \pm 6$ , and  $65 \pm 6\%$ ). Equal and progressively delayed gastric emptying due to the increasing loads was found in both groups. Incretin hormone responses were similar.

**Conclusions:** Up-regulation of the incretin effect in response to increasing oral glucose loads seems to be crucial for controlling glucose excursions in healthy subjects. Patients with T2DM are characterized by an impaired capability to regulate their incretin effect, which may contribute to the exaggerated glucose excursions after oral ingestion of glucose in these patients. (*J Clin Endocrinol Metab* 96: 737–745, 2011)

The incretin effect refers to the phenomenon that oral glucose elicits a higher insulin response than iv glucose at identical plasma glucose profiles (isoglycemia) (1, 2). The incretin effect is conveyed by the two incretin hormones glucagon-like peptide-1 (GLP-1) and glucose-dependent insulinotropic polypeptide (GIP) (3, 4). They are secreted from intestinal endocrine cells in response to ingestion of nutrients, and both are highly insulinotropic at their physiological plasma concentrations in a strictly glucose-dependent manner (4, 5). The incretin effect is

gauged by comparing insulin responses after oral ingestion of glucose and isoglycemic iv glucose infusion (IIGI), respectively (6).

Nauck *et al.* (7) estimated the incretin effect in healthy subjects during different glucose loads (25, 50, and 100 g) and showed that the incretin effect increases with increased amounts of oral glucose, resulting in similar plasma glucose excursions during the three loads. This regulatory capability was partly explained by increased GIP responses to the larger oral glucose loads, but re-

ISSN Print 0021-972X ISSN Online 1945-7197

Printed in U.S.A.

Copyright © 2011 by The Endocrine Society

doi: 10.1210/jc.2010-2435 Received October 14, 2010. Accepted December 22, 2010.

First Published Online January 20, 2011

For editorial see page 620

Abbreviations: AUC, Area under the curve; BMI, body mass index; FPG, fasting plasma glucose; GIP, glucose-dependent insulinotropic polypeptide; GLP-1, glucagon-like peptide-1; IIGI, isoglycemic iv glucose infusion; ISR, insulin secretion rate; NS, not significant; OGTT, oral glucose tolerance test; T2DM, type 2 diabetes mellitus.

sponses of the other incretin hormone GLP-1 were not measured. It is uncertain whether patients with type 2 diabetes mellitus (T2DM) are able to increase their incretin effect in response to larger oral glucose loads equivalent to healthy subjects. With the present study, we aimed to quantify the incretin effect and incretin hormone responses in patients with T2DM and in healthy control subjects during increasing oral glucose challenges.

## Subjects and Methods

The protocol was approved by the Scientific-Ethical Committee of the Capital Region of Denmark (registration no. H-A-2007-0048), the Danish Data Protection Agency (registration j.nr. 2007-41-1058) and at [www.ClinicalTrials.gov](http://www.ClinicalTrials.gov) (ID NCT00529048). The study was conducted according to the principles of the Helsinki Declaration II.

### Subjects

Eight patients (three males) with T2DM [mean age, 57 (range 40–75) yr; body mass index (BMI), 29 (25–34) kg/m<sup>2</sup>; fasting plasma glucose (FPG): 7.7 (7.0–8.9) mM; glycosylated hemoglobin (HbA<sub>1c</sub>), 7.0% (6.2–8.4%); duration of diabetes, 8 (6–36) months] and eight gender-, age-, and BMI-matched healthy control subjects [age, 57 (38–74) yr; BMI, 29 (26–33) kg/m<sup>2</sup>; FPG, 5.3 (4.8–5.7) mM; and glycosylated hemoglobin (HbA<sub>1c</sub>), 5.4% (5.0–5.7%)] were studied. All patients with T2DM were diagnosed according to the criteria of the World Health Organization (8). The patients were treated with diet and exercise only. None of the patients had impaired renal function, microalbuminuria, proliferative retinopathy, or impaired liver function. All healthy control subjects were without family history of diabetes and had normal glucose tolerance according to a 75-g oral glucose tolerance test (OGTT) performed immediately before inclusion in the study. All participants were negative with regard to islet cell autoantibodies and glutamic acid decarboxylase-65 autoantibodies. None of the subjects used drugs suspected to influence glucose, insulin, C-peptide, or incretin hormone responses during oral and iv glucose administration. Hypercholesterolemia and hypertension, if any, were well treated in both groups. All subjects agreed to participate after receiving oral and written information.

### Experimental design

All participants were studied on six different occasions: 25-, 75-, and 125-g OGTTs and three corresponding IIGIs over a 4-wk period. On all occasions, the subjects were studied in the morning in a recumbent position after an overnight (10 h) fast including medication and use of tobacco. On OGTT days (d 1A, 2A, and 3A, performed in randomized order), a cannula was inserted in a cubital vein for collection of arterialized blood samples. The cannulated forearm was placed in a heating box (50°C) throughout the experiment. The participants ingested 25 g (d 1A), 75 g (d 2A), or 125 g (d 3A) of water-free glucose, dissolved in 300 ml water containing 1.5 g acetaminophen (Panodil). Blood samples were drawn 15, 10, and 0 min before and 5, 10, 15, 20, 25, 30, 35, 40, 45, 50, 60, 70, 90, 120, 150, 180, and 240 min after ingestion of glucose. Blood was distributed into chilled

tubes containing EDTA and aprotinin (500 kIU/ml blood; Trasylol; Bayer, Leverkusen, Germany) for analyses of GLP-1 and GIP. For analyses of insulin and C-peptide, blood was distributed into chilled tubes containing heparin. EDTA and heparin tubes were immediately cooled and kept on ice until centrifugation. Blood for analysis of acetaminophen was distributed into dry tubes for coagulation (20 min at room temperature). All samples were centrifuged for 20 min at 1200 × g and 4°C. Plasma samples for GLP-1 and GIP analyses, and serum samples for acetaminophen analysis were stored at –20°C, and plasma samples for insulin and C-peptide analyses were stored at –80°C until analysis. For bedside measurement of plasma glucose, blood was distributed into fluoride tubes and centrifuged immediately at 7400 × g for 2 min at room temperature. After the three OGTTs, three corresponding IIGIs were performed in randomized order (d 1B, 2B, and 3B). On IIGI days, cannulas were inserted into cubital veins in both arms: one for collection of arterialized blood samples (see above) and one for glucose infusion. IIGI was performed using a sterile 20% wt/vol glucose infusion. The infusion rate was adjusted aiming at duplication of the plasma glucose profile determined during the corresponding OGTT (plasma glucose profiles achieved on A days were copied on corresponding B days). Blood was sampled as on OGTT days (d 1A, 2A, and 3A), except for more frequent plasma glucose sampling to adjust the glucose infusion rate. Before each experiment, the urinary bladder was emptied, and total urine production during each experiment was collected to measure renal glucose excretion.

### Analyses

Plasma concentrations of glucose were measured by the glucose oxidase method, using a glucose analyzer (Yellow Springs Instrument model 2300 STAT plus analyzer; YSI Inc., Yellow Springs, OH). Plasma insulin and C-peptide concentrations were measured using a two-sided electrochemiluminescence immunoassay (Roche/Hitachi Modular analytics; Roche Diagnostic GmbH, Mannheim, Germany) (9, 10). Plasma concentrations of total GLP-1 and GIP were measured by RIAs as previously described (11, 12). Serum acetaminophen was measured by the Vitros ACET slide method based on an aryl acyl amidase reaction linked to a color shift reaction using liquid chromatography for quantification as described elsewhere (13, 14). Concentrations of glucose in urine were measured by a hexokinase method (Konelab PRIME 60; Thermo Fisher Scientific Inc., Pittsburgh, PA).

### Statistical analyses and calculations

Baseline, peak, area under the curve (AUC), and incretin effect values are expressed as mean ± SEM. Differences resulting in *P* values <0.05 were considered significant. For analysis of interload variations, repeated-measurement ANOVA after Greenhouse-Geisser (G-G) or Huynh-Feldt (H-F) depending on sphericity assumption ( $\epsilon < 0.75 \rightarrow$  G-G;  $\epsilon > 0.75 \rightarrow$  H-F) (15) was used. As *post hoc* analysis, Bonferroni adjustments were used. For analysis of OGTT *vs.* IIGI days or intergroup variation, paired-samples *t* test (two-tailed) was used. Differences between time courses were compared using two-factor repeated-measurement ANOVA. One-sample *t* test (two-tailed) was used to test for significant incretin effects (different from 0). Paired and unpaired two-sample *t* tests (two-tailed) were used as required to test parameters within and between the groups. AUC values were calculated using the trapezoidal rule and are presented as total AUC if nothing else is stated. Insulin secretion rate (ISR) values were

calculated by deconvolution of measured C-peptide concentrations and application of population-based parameters for C-peptide kinetics as described previously (16–18). ISR is expressed as picomoles insulin secreted per minute per kilogram body weight. Homeostasis model assessment was used to assess insulin resistance (19). Incretin effects were calculated by relating the difference in integrated  $\beta$ -cell secretory responses (AUC for insulin and C-peptide, respectively; and  $\text{ISR} \times \text{time}$ ) between stimulation with OGTT and IIGI to the response after OGTT, which was taken as 100% [incretin effect (percent) =  $100\% \times (\text{AUC}_{\text{OGTT}} - \text{AUC}_{\text{IIGI}})/\text{AUC}_{\text{OGTT}}$ ] (6).

## Results

### Glucose

FPG was similar on all experimental days in the two groups, but higher in the patients than in the healthy control subjects (Table 1). As illustrated in Fig. 1, similar peak plasma glucose values in response to 25-, 75-, and 125-g OGTTs were observed in healthy control subjects (Table 1). Nevertheless, a protracted decrease in plasma glucose with increasing oral glucose loads was observed (Fig. 1 and Table 1). The patients with T2DM displayed increasing plasma glucose excursions with increasing glucose load and, accordingly, increasing AUC and peak plasma

glucose values (Fig. 1 and Table 1). Glucose infusions resulted in isoglycemia compared with the respective oral response in both groups [ $P$  = not significant (NS)]. Urinary glucose excretion was similar during OGTTs and corresponding IIGIs in both groups. In the patients with T2DM, a significant and increasing amount of glucose was excreted with increasing amount of glucose given, although the maximal excretion amounted to only 4.0 g despite the different glucose loads and plasma glucose profiles (Table 1). Urinary glucose excretion was calculated based on pooled data from both OGTT and corresponding IIGI.

### Insulin, C-peptide, and ISR

Time courses for plasma insulin and C-peptide and ISR are shown in Fig. 2, and AUC, peak values, and incretin effect are given in Table 2. Similar fasting values of insulin and C-peptide, respectively, were observed on the two experimental days in each group ( $P$  = NS), but higher fasting insulin and C-peptide levels and ISR values were seen in patients with T2DM compared with healthy control subject (Table 2). Homeostasis model assessment for insulin resistance was significantly greater in patients with T2DM compared with healthy control subjects (Table 3). In both groups, increasing oral glucose loads resulted in significant enhancement of insulin and C-peptide excursions and ISR responses (Fig. 2). Significant differences between OGTT and IIGI days with regard to time courses for insulin, C-peptide, and ISR were evident among healthy control subjects. No such differences between OGTT and IIGI time courses were found in patients with T2DM except for a small, but significant difference in C-peptide and ISR responses between d 2A (75-g OGTT) and 2B (corresponding IIGI). The control group exhibited similar peak concentrations for insulin during the OGTT as patients with T2DM, but they were reached after 30–70 min, which was significantly ( $P \leq 0.01$ ) earlier compared with patients with T2DM (30–150 min) (Table 2 and Fig. 2). The same pattern of protracted excursions among patients with T2DM was observed with regard to C-peptide and ISR (Fig. 2).

### Incretin effect

As indicated in Table 2, significant increases in incretin effect based on insulin, C-peptide, and ISR data were observed in both groups in response to increasing oral glucose loads. Nevertheless, during the 125-g OGTT, patients with T2DM only managed to reach an incretin effect similar to what healthy control subjects exhibited with a fifth of the amount of glucose (25 g). The incretin effect based on insulin, C-peptide, and ISR was significantly lower in the group of patients with T2DM during all three

**TABLE 1.** Glucose

|                                     | T2DM                         | Control                     | t test (P) |
|-------------------------------------|------------------------------|-----------------------------|------------|
| Baseline                            |                              |                             |            |
| FPG (mm)                            | 7.7 $\pm$ 0.1                | 5.4 $\pm$ 0.1               | <0.001     |
| Peak values (mmol/liter)            |                              |                             |            |
| 25-g OGTT                           | 12.8 $\pm$ 0.5 <sup>a</sup>  | 8.9 $\pm$ 0.5               | <0.001     |
| 75-g OGTT                           | 17.5 $\pm$ 0.8               | 10.4 $\pm$ 0.9              | <0.001     |
| 125-g OGTT                          | 17.7 $\pm$ 1.2               | 10.2 $\pm$ 0.9              | <0.001     |
| ANOVA (P)                           | 0.001                        | NS                          |            |
| PG response (mm $\times$ min)       |                              |                             |            |
| 25-g OGTT                           | 2.1 $\pm$ 0.3 <sup>a</sup>   | 1.4 $\pm$ 0.1 <sup>a</sup>  | <0.001     |
| 75-g OGTT                           | 3.0 $\pm$ 0.1                | 1.5 $\pm$ 0.1 <sup>a</sup>  | <0.001     |
| 125-g OGTT                          | 3.3 $\pm$ 0.2                | 1.8 $\pm$ 0.1 <sup>a</sup>  | <0.001     |
| ANOVA (P)                           | <0.001                       | <0.001                      |            |
| Glucose infusions (g)               |                              |                             |            |
| IIGI (25 g)                         | 23.4 $\pm$ 2.0 <sup>a</sup>  | 14.5 $\pm$ 2.9 <sup>a</sup> | 0.022      |
| IIGI (75 g)                         | 63.4 $\pm$ 3.3               | 36.0 $\pm$ 3.7 <sup>a</sup> | <0.001     |
| IIGI (125 g)                        | 78.6 $\pm$ 5.7               | 44.4 $\pm$ 3.6 <sup>a</sup> | <0.001     |
| ANOVA (P)                           | <0.001                       | <0.001                      |            |
| Total urinary glucose excretion (g) |                              |                             |            |
| 25 g                                | 0.06 $\pm$ 0.03 <sup>a</sup> | 0.02 $\pm$ 0.02             | NS         |
| 75 g                                | 3.01 $\pm$ 0.73              | 0.32 $\pm$ 0.27             | 0.001      |
| 125 g                               | 4.00 $\pm$ 0.86              | 0.65 $\pm$ 0.43             | 0.001      |
| ANOVA (P)                           | 0.002                        | NS                          |            |

Data for healthy control subjects and patients with T2DM are mean values  $\pm$  SEM.  $P$  values are derived from two-tailed  $t$  test for intergroup variation and repeated-measurement ANOVA for interload variations.

<sup>a</sup> Significant differences ( $P < 0.05$ ) in the interload observations (post hoc analysis) from both of the other glucose loads compared. Total plasma glucose responses are calculated as total AUC.

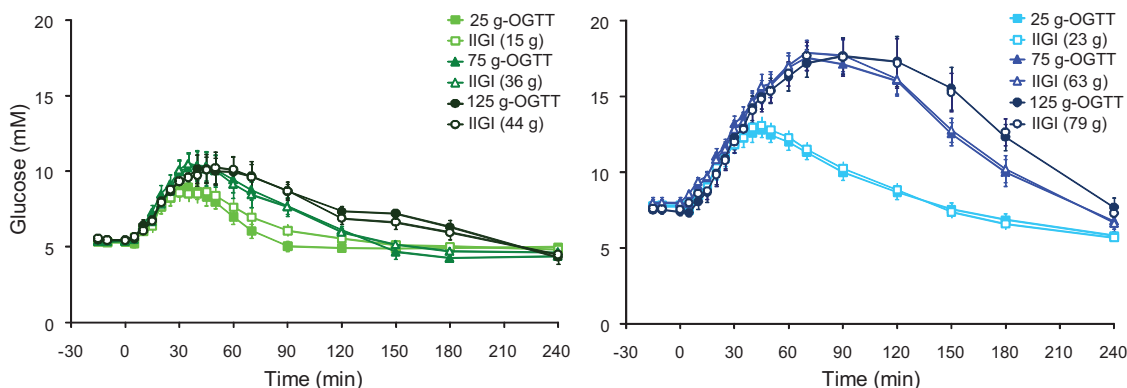

**FIG. 1.** Time courses for plasma glucose concentrations in patients with T2DM (blue curves) and in healthy control subjects (green curves). Color tone indicates each set of OGTT and IIGI [light, 25-g OGTT (closed symbols) and corresponding IIGI (open symbols); medium, 75-g OGTT (closed symbols) and corresponding IIGI (open symbols); and dark, 125-g OGTT (closed symbols) and corresponding IIGI (open symbols)].

experiments compared with the healthy control subjects (Table 2). Absolute incretin effects were measured as  $(AUC_{OGTT} - AUC_{IIGI})/AUC_{OGTT}$  for the three  $\beta$ -cell secretory parameters. Calculated in this way, the incretin effect (whether based on insulin, C-peptide, or ISR) was not significantly different from zero in the patients at either 25- or 75-g glucose loads but was significant in response to 125-g OGTT, whereas a significant effect was observed in the controls at all doses.

## GIP

No significant differences in baseline levels between OGTTs or IIGIs in either group were observed. As indicated in Table 3, fasting levels of GIP were significantly higher in patients with T2DM compared with healthy control subjects. No differences in GIP responses during OGTTs were observed between the groups ( $P = NS$ ). Both groups displayed brisk rises in GIP concentration in response to increasing oral glucose loads; the excursions were identical during the first 45 min, and thereafter, differences were observed (Fig. 3). Similarly, AUC values showed significantly increasing GIP responses with increasing oral glucose loads (Table 3). As expected, no significant GIP responses occurred during IIGIs in any of the two groups (Fig. 3).

## GLP-1

There were no differences in mean fasting values between the groups. As shown in Fig. 3 and Table 3, increasing GLP-1 responses were obtained in both groups during increasing oral glucose loads with no differences between the groups ( $P = NS$ ). AUC values were significantly larger during OGTTs compared with corresponding IIGIs, during which no significant GLP-1 responses occurred, in any of the groups. No significant differences in peak values were observed between the groups.

## Gastric emptying

There were no significant differences in gastric emptying (assessed by serum acetaminophen excursions) between the groups during any of the three different glucose loads. However, a markedly prolonged emptying time was observed with increasing oral glucose loads in both groups ( $P < 0.05$ ) as assessed by time to peak of plasma acetaminophen [25 g,  $41 \pm 4$  (T2DM) vs.  $36 \pm 5$  min (healthy control subjects),  $P = NS$ ; 75 g,  $92 \pm 9$  vs.  $105 \pm 15$  min,  $P = NS$ ; 125 g,  $131 \pm 11$  vs.  $150 \pm 16$  min,  $P = NS$ ] (Fig. 4).

## Discussion

The novel findings of the present study include 1) a markedly reduced capability to regulate the incretin effect in response to increasing oral glucose loads among patients with T2DM, 2) similar and progressively prolonged responses of GIP and GLP-1 with increasing oral glucose load in both patients with T2DM and healthy control subjects, and 3) identification of delayed gastric emptying as an efficient mean of reducing postprandial glucose excursions in both patients with T2DM and healthy control subjects.

In healthy subjects, the increasing incretin effect in response to larger oral glucose loads is the most probable explanation for their ability to limit the plasma glucose excursions to such stimuli. In 1986, Nauck and co-workers (7) published data demonstrating identical plasma glucose excursions after different oral glucose loads (25, 50, and 100 g) in healthy control subjects. From that study, it was concluded that the ability to increase the incretin effect ensures that hyperglycemia does not occur regardless of the size of the glucose load (7). This adaptive regulation of the incretin effect, as assessed by the isoglycemic clamp technique, has never previously been evaluated in patients with T2DM, nor have both of the incretin hormone re-

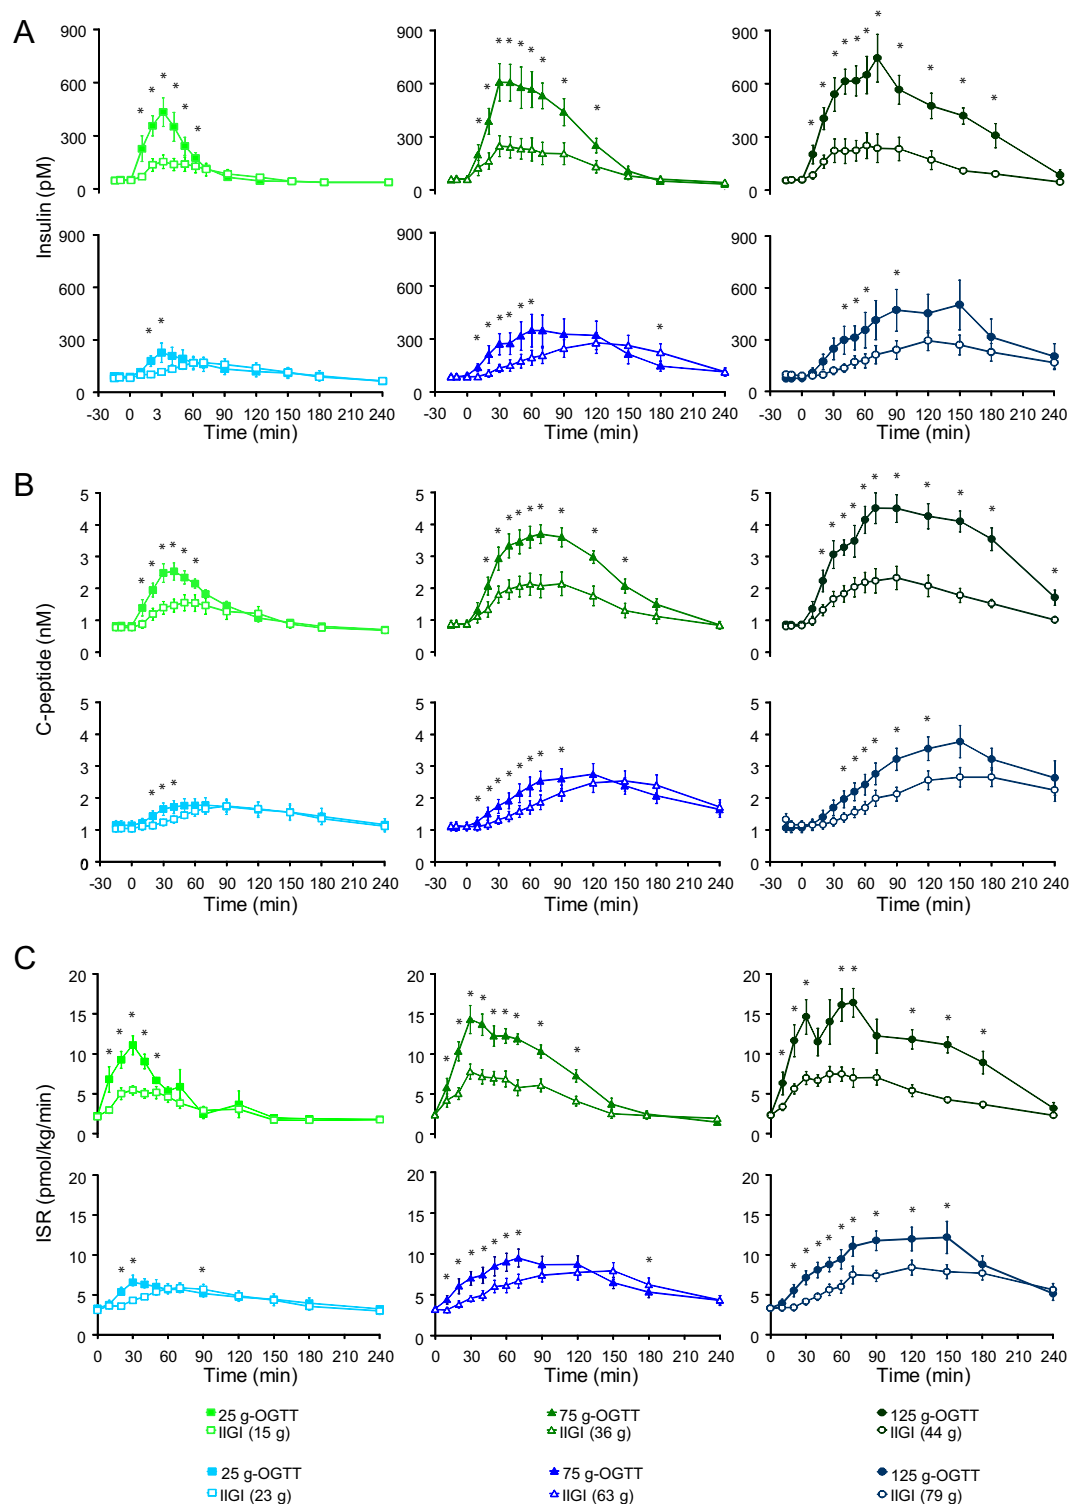

**FIG. 2.** Time courses for plasma concentrations of insulin (A) and C-peptide (B) and ISR (C) in patients with T2DM (blue curves) and in healthy control subjects (green curves). Color tone indicates each set of OGTT and IIGI [light, 25-g OGTT (closed symbols) and corresponding IIGI (open symbols); medium, 75-g OGTT (closed symbols) and corresponding IIGI (open symbols); and dark, 125-g OGTT (closed symbols) and corresponding IIGI (open symbols)]. Asterisks indicate significant differences on behalf of paired-samples *t* test referring to the specific time points.

sponses during increasing oral glucose loads in healthy subjects and patients with T2DM been investigated. Our results confirm the findings of Nauck *et al.* (7) that similar plasma glucose excursions in response to a wide range of different oral glucose challenges occur in healthy sub-

jects. Interestingly, in the healthy control subjects volunteering for the present study, we observed equal plasma glucose peak values despite a 5-fold increase in oral glucose loads (from 25–125 g). However, a progressively protracted elevated plateau profile was observed with



**TABLE 2.**  $\beta$ -cell responses

|                                   | Insulin                                   |                                          |            | C-peptide                                     |                                               |            | ISR                                           |                                               |               |
|-----------------------------------|-------------------------------------------|------------------------------------------|------------|-----------------------------------------------|-----------------------------------------------|------------|-----------------------------------------------|-----------------------------------------------|---------------|
|                                   | T2DM                                      | Control                                  | t test (P) | T2DM                                          | Control                                       | t test (P) | T2DM                                          | Control                                       | t test (P)    |
| Baseline                          | 86.3 $\pm$ 5.8                            | 55.4 $\pm$ 3.3                           | <0.001     | 1.1 $\pm$ 0.1                                 | 0.8 $\pm$ 0.0                                 | <0.001     | 3.2 $\pm$ 0.1                                 | 2.3 $\pm$ 0.1                                 | <0.001        |
| Peak values                       |                                           |                                          |            |                                               |                                               |            |                                               |                                               |               |
| 25-g OGTT (IIGI)                  | 226 $\pm$ 55<br>(169 $\pm$ 32)            | 434 $\pm$ 81<br>(154 $\pm$ 38)           | NS<br>(NS) | 1.8 $\pm$ 0.2 <sup>b</sup><br>(1.7 $\pm$ 0.2) | 2.5 $\pm$ 0.3 <sup>b</sup><br>(1.6 $\pm$ 0.3) | NS<br>(NS) | 7 $\pm$ 1 <sup>b</sup><br>(6 $\pm$ 1)         | 11 $\pm$ 1 <sup>b</sup><br>(6 $\pm$ 1)        | 0.02<br>(NS)  |
| 75-g OGTT (IIGI)                  | 348 $\pm$ 92<br>(278 $\pm$ 58)            | 608 $\pm$ 106<br>(248 $\pm$ 59)          | NS<br>(NS) | 2.7 $\pm$ 0.3 <sup>b</sup><br>(2.5 $\pm$ 0.3) | 3.7 $\pm$ 0.3<br>(2.1 $\pm$ 0.4)              | NS<br>(NS) | 10 $\pm$ 1<br>(8 $\pm$ 1)                     | 14 $\pm$ 2<br>(8 $\pm$ 1)                     | NS<br>(NS)    |
| 125-g OGTT (IIGI)                 | 502 $\pm$ 144<br>(295 $\pm$ 57)           | 745 $\pm$ 135<br>(251 $\pm$ 73)          | NS<br>(NS) | 3.8 $\pm$ 0.5 <sup>b</sup><br>(2.7 $\pm$ 0.3) | 4.5 $\pm$ 0.5<br>(2.3 $\pm$ 0.4)              | NS<br>(NS) | 12 $\pm$ 2<br>(8 $\pm$ 1)                     | 16 $\pm$ 2<br>(8 $\pm$ 1)                     | NS<br>(NS)    |
| ANOVA (P)                         | NS                                        | 0.042                                    |            | <0.001                                        | <0.001                                        |            | 0.038                                         | 0.016                                         |               |
| Plasma response (4 h $\times$ nm) |                                           |                                          |            |                                               |                                               |            |                                               |                                               |               |
| 25-g OGTT (IIGI)                  | 30 $\pm$ 7 <sup>b</sup><br>(28 $\pm$ 5)   | 27 $\pm$ 4 <sup>b</sup><br>(18 $\pm$ 4)  | NS<br>(NS) | 366 $\pm$ 51 <sup>b</sup><br>(343 $\pm$ 40)   | 315 $\pm$ 25 <sup>b</sup><br>(257 $\pm$ 38)   | NS<br>(NS) | 2.0 $\pm$ 0.3 <sup>b</sup><br>(1.8 $\pm$ 0.2) | 1.7 $\pm$ 0.2 <sup>b</sup><br>(1.3 $\pm$ 0.1) | NS<br>(0.049) |
| 75-g OGTT (IIGI)                  | 56 $\pm$ 12 <sup>b</sup><br>(47 $\pm$ 9)  | 63 $\pm$ 9 <sup>b</sup><br>(31 $\pm$ 8)  | NS<br>(NS) | 515 $\pm$ 58 <sup>b</sup><br>(481 $\pm$ 57)   | 561 $\pm$ 42 <sup>b</sup><br>(360 $\pm$ 57)   | NS<br>(NS) | 2.9 $\pm$ 0.3 <sup>b</sup><br>(2.6 $\pm$ 0.3) | 2.9 $\pm$ 0.2 <sup>b</sup><br>(1.8 $\pm$ 0.2) | NS<br>(NS)    |
| 125-g OGTT (IIGI)                 | 82 $\pm$ 20 <sup>b</sup><br>(50 $\pm$ 10) | 99 $\pm$ 11 <sup>b</sup><br>(35 $\pm$ 8) | NS<br>(NS) | 680 $\pm$ 71 <sup>b</sup><br>(515 $\pm$ 56)   | 823 $\pm$ 65 <sup>b</sup><br>(412 $\pm$ 49)   | NS<br>(NS) | 3.9 $\pm$ 0.4 <sup>b</sup><br>(2.8 $\pm$ 0.3) | 4.5 $\pm$ 0.5 <sup>b</sup><br>(2.1 $\pm$ 0.2) | NS<br>(NS)    |
| ANOVA (P)                         | 0.008                                     | <0.001                                   |            | <0.001                                        | <0.001                                        |            | <0.001                                        | <0.001                                        |               |
| Incretin effect (%)               |                                           |                                          |            |                                               |                                               |            |                                               |                                               |               |
| 25-g OGTT                         | 0 $\pm$ 7                                 | 36 $\pm$ 5                               | 0.002      | 4 $\pm$ 4                                     | 20 $\pm$ 7 <sup>b</sup>                       | 0.044      | 0 $\pm$ 20                                    | 17 $\pm$ 16                                   | NS            |
| 75-g OGTT                         | 11 $\pm$ 9                                | 53 $\pm$ 6                               | 0.002      | 6 $\pm$ 5                                     | 37 $\pm$ 6                                    | 0.005      | -3 $\pm$ 26                                   | 35 $\pm$ 10                                   | NS            |
| 125-g OGTT                        | 36 $\pm$ 5 <sup>b</sup>                   | 65 $\pm$ 6 <sup>b</sup>                  | 0.003      | 24 $\pm$ 3 <sup>b</sup>                       | 49 $\pm$ 5                                    | 0.001      | 21 $\pm$ 17                                   | 48 $\pm$ 8                                    | NS            |
| ANOVA (P)                         | 0.016                                     | 0.001                                    |            | 0.010                                         | <0.001                                        |            | 0.041                                         | 0.019                                         |               |

Data for patients with T2DM and healthy control subjects are mean values  $\pm$  SEM. Values are compared using two-tailed *t* test for intergroup variation and repeated-measurement ANOVA for interload variations.

<sup>a</sup> Baseline and peak values are picomolar for insulin and C-peptide and picomoles per kilogram per minute for ISR.

<sup>b</sup> Significant differences ( $P < 0.05$ ) in the interload observations (*post hoc* analysis) from both of the other glucose loads compared. Total plasma glucose responses are calculated as total AUC.

increasing oral glucose loads. Looking meticulously at plasma glucose profiles from Nauck *et al.* (7), the same tendency is apparent (although not to the same extent). The tight control of the plasma glucose profiles was ascribed by Nauck *et al.* (7) to the effects of GIP secretion. Although confirming the GIP responses, our data demonstrate a similar regulation of GLP-1 secretion. In the present study, patients with T2DM were found to be characterized by a severely reduced capa-

bility to regulate the incretin effect. With the smaller glucose loads (25 and 75 g), the incretin effect was not significantly different from zero and increased to 36% only with the highest oral glucose load (125 g), similar to that seen with 25 g glucose in the healthy control subjects. Our data clearly show that the incretin effect in patients with T2DM as well as in healthy subjects cannot be presented as a single figure but must be related to the oral glucose load.

**TABLE 3.** Incretin hormones

|                                   | GLP-1                      |                            |            | GIP                         |                            |            |
|-----------------------------------|----------------------------|----------------------------|------------|-----------------------------|----------------------------|------------|
|                                   | T2DM                       | Control                    | t test (P) | T2DM                        | Control                    | t test (P) |
| Baseline (pm)                     | 21 $\pm$ 1                 | 22 $\pm$ 1                 | NS         | 12.0 $\pm$ 0.9              | 10.1 $\pm$ 0.8             | 0.014      |
| Peak values (pm)                  |                            |                            |            |                             |                            |            |
| 25-g OGTT                         | 35 $\pm$ 2                 | 32 $\pm$ 5                 | NS         | 79 $\pm$ 9                  | 83 $\pm$ 13                | NS         |
| 75-g OGTT                         | 51 $\pm$ 6                 | 69 $\pm$ 17                | NS         | 108 $\pm$ 10                | 142 $\pm$ 34               | NS         |
| 125-g OGTT                        | 58 $\pm$ 14                | 67 $\pm$ 26                | NS         | 91 $\pm$ 11                 | 106 $\pm$ 24               | NS         |
| ANOVA (P)                         | NS                         | NS                         |            | 0.021                       | NS                         |            |
| Plasma response (4 h $\times$ nm) |                            |                            |            |                             |                            |            |
| 25-g OGTT                         | 5.2 $\pm$ 0.7 <sup>a</sup> | 4.0 $\pm$ 0.5 <sup>a</sup> | 0.012      | 6.2 $\pm$ 0.7 <sup>a</sup>  | 6.1 $\pm$ 0.9 <sup>a</sup> | NS         |
| 75-g OGTT                         | 6.9 $\pm$ 0.9 <sup>a</sup> | 7.2 $\pm$ 0.9              | NS         | 10.8 $\pm$ 1.2 <sup>a</sup> | 12.3 $\pm$ 1.8             | NS         |
| 125-g OGTT                        | 9.9 $\pm$ 1.2 <sup>a</sup> | 11.3 $\pm$ 2.0             | NS         | 15.7 $\pm$ 1.4 <sup>a</sup> | 20.5 $\pm$ 3.7             | NS         |
| ANOVA (P)                         | 0.002                      | 0.006                      |            | <0.001                      | 0.001                      |            |

Data for patients with T2DM and healthy control subjects are mean values  $\pm$  SEM. *P* values are from two-tailed *t* test for intergroup variation and repeated-measurement ANOVA for interload variations. Total plasma responses are calculated as total AUC.

<sup>a</sup> Significant difference ( $P < 0.05$ ) from both of the other glucose loads compared, derived from *post hoc* analysis.

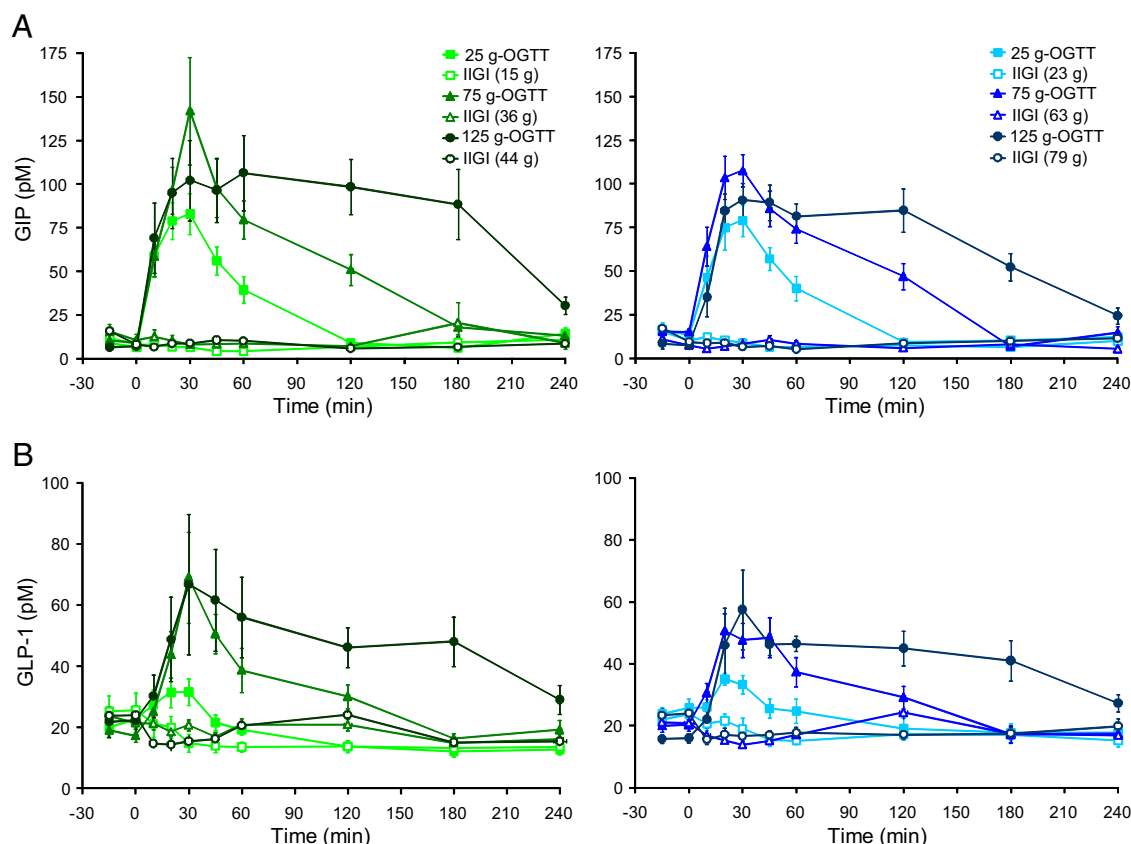

**FIG. 3.** Time courses for plasma concentrations of GIP (A) and GLP-1 (B) in patients with T2DM (blue curves) and in healthy control subjects (green curves). Color tone indicates each set of OGTT and IIGI [light, 25-g OGTT (closed symbols) and corresponding IIGI (open symbols); medium, 75-g OGTT (closed symbols) and corresponding IIGI (open symbols); and dark, 125-g OGTT (closed symbols) and corresponding IIGI (open symbols)].

The somewhat protracted glucose profiles after larger oral glucose loads demonstrated by both Nauck *et al.* (7) and us among healthy subjects are likely to result from deceleration of gastric emptying in response to the larger oral glucose loads as indicated by the acetaminophen results of the present study. Interestingly, with increasing glucose loads, a pronounced decrease in gastric emptying was observed in both healthy control subjects and patients with T2DM. This mechanism clearly serves to limit the amount of glucose emptied into the small intestine. Thereby, glucose excursions are dampened and pro-

longed, perhaps serving to avoid osmotic overload of the proximal small intestine. Conversely, accelerated gastric emptying, as observed after gastric surgery, is frequently associated with the dumping syndrome. Importantly, this mechanism is completely preserved in the patients with T2DM, but in these subjects, a severely impaired insulin secretion during oral glucose is seen, probably due to an impaired capability to regulate the incretin effect. The regulation of gastric emptying may well be the main regulator of the glucose excursions in patients with T2DM. It has been speculated that differences in the incretin effect ob-

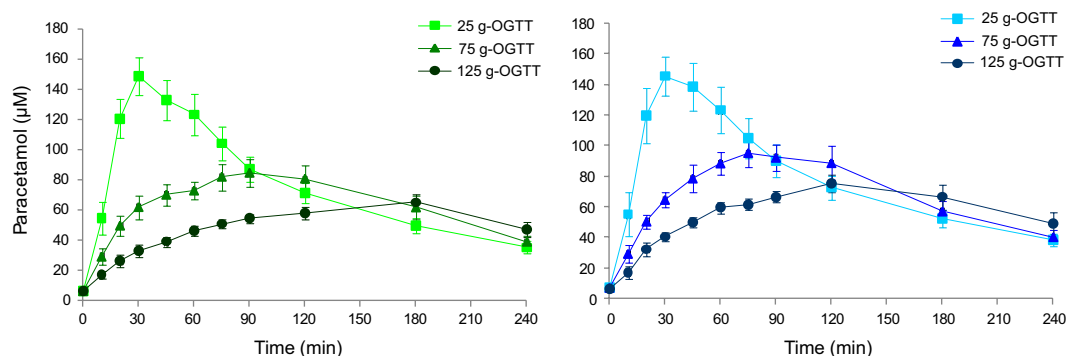

**FIG. 4.** Time courses for plasma concentrations of acetaminophen in patients with T2DM (blue curves) and in healthy control subjects (green curves). Color tone indicates each OGTT (light, 25-g OGTT; medium, 75-g OGTT; and dark, 125-g OGTT).

served among healthy control subjects and patients with T2DM could be ascribed to different gastric emptying rates (20–23). In the current study, the acetaminophen absorption technique for the measurement of gastric emptying was used. This method is a simple, noninvasive, and well-validated method that correlates well with the gold standard, the scintigraphic method (24). Therefore, the method is often used in clinical studies despite some limitations (*e.g.* provides an indirect estimation of gastric emptying and some inter-individual variation) (24, 25). However, in the present study, we found similar rates of gastric emptying between the two groups. Increased insulin resistance was seen in our patients with T2DM compared with the healthy control subjects, a phenomenon that is thought to contribute to an impaired incretin effect (26, 27). Furthermore, reduced postprandial GLP-1 responses (20, 28), decreased insulinotropic potency of GLP-1 (29) and an almost complete loss of insulin secretion in response to GIP (21, 30) have been proposed as potential contributors to the impaired incretin effect in T2DM. Because one of the aims of the present study was to evaluate the secretion of incretin hormones after increasing oral glucose loads, both GIP and GLP-1 were measured. The incretin hormone responses in the present study correspond to previously reported findings: no differences in GIP or GLP-1 responses to OGTT between healthy control subjects and patients with T2DM (31, 32). Both incretin hormones show rapid increases to similar peak concentrations after all three glucose loads but progressively protracted responses to increasing loads. This finding is probably best explained by the effect on gastric emptying of the larger glucose loads (the larger the load the slower the gastric emptying), providing almost equal amounts of glucose per unit of time to the upper small intestine. The similar incretin hormone responses in patients with T2DM and healthy control subjects are consistent with the notion that reduced insulinotropic potencies of the incretin hormones are the most important mechanisms behind the reduced incretin effect in patients with T2DM (33). Increased urinary excretion of glucose could also contribute to the regulation of the glucose profiles and thereby mask a deficit in the incretin effect, but only small amounts of glucose were excreted by the kidneys during the high glucose loads, which therefore do not explain the results. The minor glucose excretion found in the patients with T2DM in this study possibly result from increased renal glucose reuptake, potentially amplifying the postprandial glucose excursions (34, 35).

In conclusion, our results suggest that patients with T2DM are characterized by a reduced ability to increase their incretin effect to levels that allow accommodation of large glucose loads, thereby resulting in exaggerated post-

absorptive glucose excursions. This pathophysiological trait may contribute to the relative insulin deficiency and hyperglycemia in the postprandial state, especially during large meals, in patients with T2DM.

## Acknowledgments

We are grateful to our volunteers whose availability made this work possible and to Ulla K. Hansen, Tonni L. Hansen, Dorthe Mogenssen, and Lone Bagger.

Address all correspondence and requests for reprints to: Dr. Tina Vilsbøll, M.D., D.M.Sc., Head of Diabetes Research Division, Department of Internal Medicine F, Gentofte Hospital, University of Copenhagen, Niels Andersens Vej 65, DK-2900 Hellerup, Denmark. E-mail: t.vilsboll@dadlnet.dk.

This work was supported by an unrestricted research grant (no. 34851) from the Investigator Initiated Studies Program of Merck & Co., Inc. The opinions expressed in this paper are those of the authors and do not necessarily represent those of Merck & Co., Inc. The funding source had no involvement in the study design; in the collection, analysis, or interpretation of the data; or in the decision to submit the paper for publication.

The study is registered at [www.ClinicalTrials.gov](http://www.ClinicalTrials.gov) as NCT00529048.

The study was presented in 2009 at the American Diabetes Association 69th Scientific Session (abstract P-1421).

Disclosure Summary: The authors had no conflicts of interests in relation to this present paper.

## References

1. Creutzfeldt W, Ebert R 1985 New developments in the incretin concept. *Diabetologia* 28:565–573
2. Perley M, Kipnis DM 1966 Plasma insulin responses to glucose and tolbutamide of normal weight and obese diabetic and nondiabetic subjects. *Diabetes* 15:867–874
3. Vilsbøll T, Holst JJ 2004 Incretins, insulin secretion and type 2 diabetes mellitus. *Diabetologia* 47:357–366
4. Holst JJ 2007 The physiology of glucagon-like peptide 1. *Physiol Rev* 87:1409–1439
5. Vilsbøll T, Krarup T, Madsbad S, Holst JJ 2003 Both GLP-1 and GIP are insulinotropic at basal and postprandial glucose levels and contribute nearly equally to the incretin effect of a meal in healthy subjects. *Regul Pept* 114:115–121
6. Nauck M, Stöckmann F, Ebert R, Creutzfeldt W 1986 Reduced incretin effect in type 2 (non-insulin-dependent) diabetes. *Diabetologia* 29:46–52
7. Nauck MA, Homberger E, Siegel EG, Allen RC, Eaton RP, Ebert R, Creutzfeldt W 1986 Incretin effects of increasing glucose loads in man calculated from venous insulin and C-peptide responses. *J Clin Endocrinol Metab* 63:492–498
8. Expert Committee on the Diagnosis and Classification of Diabetes Mellitus 2003 Report of the expert committee on the diagnosis and classification of diabetes mellitus. *Diabetes Care* 26(Suppl 1):S5–S20
9. Bablok W, Passing H, Bender R, Schneider B 1988 A general regression procedure for method transformation. Application of linear regression procedures for method comparison studies in clinical chemistry, part III. *J Clin Chem Clin Biochem* 26:783–790



10. Hare KJ, Knop FK, Asmar M, Madsbad S, Deacon CF, Holst JJ, Vilsbøll T 2009 Preserved inhibitory potency of GLP-1 on glucagon secretion in type 2 diabetes mellitus. *J Clin Endocrinol Metab* 94:4679–4687
11. Orskov C, Rabenhøj L, Wettergren A, Kofod H, Holst JJ 1994 Tissue and plasma concentrations of amidated and glycine-extended glucagon-like peptide I in humans. *Diabetes* 43:535–539
12. Krarup T, Holst JJ 1984 The heterogeneity of gastric inhibitory polypeptide in porcine and human gastrointestinal mucosa evaluated with five different antisera. *Regul Pept* 9:35–46
13. Miceli JN, Aravind MK, Cohen SN, Done AK 1979 Simultaneous measurements of acetaminophen and salicylate in plasma by liquid chromatography. *Clin Chem* 25:1002–1004
14. Medhus AW, Lofthus CM, Bredesen J, Husebye E 2001 Gastric emptying: the validity of the paracetamol absorption test adjusted for individual pharmacokinetics. *Neurogastroenterol Motil* 13:179–185
15. Keselman HJ, Algina J, Kowalchuk RK 2001 The analysis of repeated measures designs: a review. *Br J Math Stat Psychol* 54:1–20
16. Van Cauter E, Mestrez F, Sturis J, Polonsky KS 1992 Estimation of insulin secretion rates from C-peptide levels. Comparison of individual and standard kinetic parameters for C-peptide clearance. *Diabetes* 41:368–377
17. Kjems LL, Christiansen E, Vølund A, Bergman RN, Madsbad S 2000 Validation of methods for measurement of insulin secretion in humans in vivo. *Diabetes* 49:580–588
18. Kjems LL, Vølund A, Madsbad S 2001 Quantification of  $\beta$ -cell function during IVGTT in type II and non-diabetic subjects: assessment of insulin secretion by mathematical methods. *Diabetologia* 44:1339–1348
19. Matthews DR, Hosker JP, Rudenski AS, Naylor BA, Treacher DF, Turner RC 1985 Homeostasis model assessment: insulin resistance and  $\beta$ -cell function from fasting plasma glucose and insulin concentrations in man. *Diabetologia* 28:412–419
20. Toft-Nielsen MB, Damholt MB, Madsbad S, Hilsted LM, Hughes TE, Michelsen BK, Holst JJ 2001 Determinants of the impaired secretion of glucagon-like peptide-1 in type 2 diabetic patients. *J Clin Endocrinol Metab* 86:3717–3723
21. Vilsbøll T, Krarup T, Sonne J, Madsbad S, Vølund A, Juul AG, Holst JJ 2003 Incretin secretion in relation to meal size and body weight in healthy subjects and people with type 1 and type 2 diabetes mellitus. *J Clin Endocrinol Metab* 88:2706–2713
22. Willms B, Werner J, Creutzfeldt W, Orskov C, Holst J, Nauck M 1994 Inhibition of gastric emptying by glucagon-like peptide (7-36) amide in patients with type-2 diabetes mellitus. *Diabetologia* 37:A118 (Abstract)
23. Pilichiewicz AN, Chaikomin R, Brennan IM, Wishart JM, Rayner CK, Jones KL, Smout AJ, Horowitz M, Feinle-Bisset C 2007 Load-dependent effects of duodenal glucose on glycemia, gastrointestinal hormones, antroypyloroduodenal motility, and energy intake in healthy men. *Am J Physiol Endocrinol Metab* 293:E743–E753
24. Willems M, Quartero AO, Numans ME 2001 How useful is paracetamol absorption as a marker of gastric emptying? A systematic literature study. *Dig Dis Sci* 46:2256–2262
25. Sanaka M, Nakada K 2008 Paracetamol absorption test with Wagner-Nelson analysis for safe and accurate measurements of gastric emptying in women. *Methods Find Exp Clin Pharmacol* 30:753–756
26. Knop F, Bagger J, Lund A, Vestergaard H, Holst J, Vilsbøll T 2009 Glucagon responses to increasing oral loads of glucose and corresponding isoglycemic intravenous glucose infusions in patients with type 2 diabetes and healthy subjects. *Diabetes* 58:A368 (Abstract)
27. Hansen KB, Vilsbøll T, Bagger JI, Holst JJ, Knop FK 2010 Reduced glucose tolerance and insulin resistance induced by steroid treatment, relative physical inactivity, and high-calorie diet impairs the incretin effect in healthy subjects. *J Clin Endocrinol Metab* 95:3309–3317
28. Vilsbøll T, Krarup T, Deacon CF, Madsbad S, Holst JJ 2001 Reduced postprandial concentrations of intact biologically active glucagon-like peptide 1 in type 2 diabetic patients. *Diabetes* 50:609–613
29. Kjems LL, Holst JJ, Vølund A, Madsbad S 2003 The influence of GLP-1 on glucose-stimulated insulin secretion: effects on  $\beta$ -cell sensitivity in type 2 and nondiabetic subjects. *Diabetes* 52:380–386
30. Vilsbøll T, Krarup T, Madsbad S, Holst JJ 2002 Defective amplification of the late phase insulin response to glucose by GIP in obese Type II diabetic patients. *Diabetologia* 45:1111–1119
31. Knop F, Aaboe K, Vilsbøll T, Madsbad S, Holst J, Krarup T 2008 Reduced incretin effect in obese subjects with normal glucose tolerance as compared to lean control subjects. *Diabetes* 57:A410 (Abstract)
32. Knop FK, Vilsbøll T, Madsbad S, Holst JJ, Krarup T 2007 Inappropriate suppression of glucagon during OGTT but not during isoglycaemic i.v. glucose infusion contributes to the reduced incretin effect in type 2 diabetes mellitus. *Diabetologia* 50:797–805
33. Højberg PV, Vilsbøll T, Rabøl R, Knop FK, Bache M, Krarup T, Holst JJ, Madsbad S 2009 Four weeks of near-normalisation of blood glucose improves the insulin response to glucagon-like peptide-1 and glucose-dependent insulinotropic polypeptide in patients with type 2 diabetes. *Diabetologia* 52:199–207
34. Meyer C, Stumvoll M, Nadkarni V, Dostou J, Mitrakou A, Gerich J 1998 Abnormal renal and hepatic glucose metabolism in type 2 diabetes mellitus. *J Clin Invest* 102:619–624
35. Mogensen CE 1971 Maximum tubular reabsorption capacity for glucose and renal hemodynamics during rapid hypertonic glucose infusion in normal and diabetic subjects. *Scand J Clin Lab Invest* 28:101–109
